# Supplementary material for: Deaths averted by vaccination due to reduced transmission can exceed those from direct protection of vaccinated individuals for SARS-CoV-2
Source: bioRxiv or medRxiv preprint supplement (doi:10.1101/2021.10.25.21265500), 2025-03-11
Supplement: Supplementary file [file media-1.pdf]

## Supplemental Materials for

### Third vaccine doses could have indirectly averted >100,000 deaths in the USA by reducing transmission of the SARS-CoV-2 Delta variant

Billy J. Gardner\*, A. Marm Kilpatrick\*

*Department of Ecology and Evolutionary Biology, University of California, Santa Cruz, Santa Cruz, California, 95064 USA*

*\*To whom correspondence should be addressed: [wjgyc14@gmail.com](mailto:wjgyc14@gmail.com); [akilpatr@ucsc.edu](mailto:akilpatr@ucsc.edu)*

## Supplemental Results Text

We estimated the effect of boosting doubly-vaccinated individuals with a third dose of mRNA vaccines on  $R_t$  for five scenarios, including the one presented in the main text, that had varying vaccination and infection rates and contact rates (Figure S2; see Methods for additional details). In countries or populations that had prevented most transmission (e.g. New Zealand) resulting in a very low cumulative fraction previously infected (~1%), and where vaccination was only partly underway (24.3% of the population) and where there was no social distancing (ND), resulting contact rates being at pre-pandemic levels, ( $R_0 = 7$ ), boosting with a third dose would have reduced  $R_t$  by only 5.3% from 5.68 to 5.38 and would have been insufficient to reduce  $R_t$  below 1 to prevent a surge (Figure S2: Scenario NZ/ND, blue line). Similarly if contact rates in the US had returned to pre-pandemic levels in September, 2021, without social distancing ( $R_0 = 7$ ), and with the observed vaccine coverage (53.2%) and infection history (67.4%), then boosting all doubly vaccinated individuals would have reduced  $R_t$  by the same amount as the scenario in the main text, 18.4%, since the change in VE would be identical, but  $R_t$  would decrease from 2.57 to 2.10 (Figure S2: Scenario US/ND, purple line) rather than 1.17 to 0.96. This clearly would not have been sufficient to stop a huge surge in transmission (Figure S2: Scenario US/ND, purple line).

If the US population had originally achieved 100% vaccination coverage, but assuming the timing of vaccinations remained the same, and 67.4% had been previously infected, waning of vaccine and infection-derived immunity by late September 2021 would have led to a sizeable surge without boosting assuming pre-pandemic contact rates ( $R_0 = 7$ ) (Figure S2: Scenario US/ND-100, left end of green line:  $R_t=1.14$ ). However, boosting only 17.9% of this fully (100%)

vaccinated population would have reduced  $R_t$  below 1 and thus could prevent a surge in cases (Figure S2 Scenario US/ND-100, green line crosses the  $R_t = 1$  line at 17.9%). Boosting the entire population with a third dose would have reduced  $R_t$  by 69.8% from 1.14 to 0.34 which would have essentially stopped transmission (Figure S2: Scenario US/ND-100, right end of green line:  $R_t=0.34$ ).

**Supplemental Tables and Figures**

**Table S1. Statistics for the model fitting relationship between neutralizing antibody titers**

**and VE given by the equation  $VE = 1 - \frac{1}{1 + e^{-(c_0 + c_1 \log_2(NATR_{tot}))}}$ .**

| Endpoint       | Coefficient    | Estimate  | SE       | Z value  | p-value   |
|----------------|----------------|-----------|----------|----------|-----------|
| Susceptibility | c <sub>0</sub> | -1.066698 | 0.029608 | -36.027  | < 2.2e-16 |
|                | c <sub>1</sub> | -0.410926 | 0.021249 | -19.339  | < 2.2e-16 |
| Infectiousness | c <sub>0</sub> | 0.174254  | 0.057717 | 3.0191   | 0.002535  |
|                | c <sub>1</sub> | -0.506766 | 0.047208 | -10.7348 | < 2.2e-16 |

**Table S2. Analysis of relative waning rates of neutralizing antibodies relative to peak (Figure 2B) for two vaccines (BNT162b2 and mRNA-1273) and infection-derived immunity. The best fitting model by AIC included variation in slopes between vaccines and differences in asymptote between the two vaccines and infection-derived immunity:  $\log_2(\text{Antibody titer}) = (c_0 + c_1 * \text{Infection}) * e^{(c_2 * \text{Day} + c_3 * \text{Day} * \text{mRNA-1273})} - c_0 + c_1 * \text{Infection}$ , where BNT162b2 was the reference level. c<sub>0</sub> is the asymptote for long periods after vaccination for both vaccines. c<sub>1</sub> is the difference in asymptotes between infections and vaccines. We did not fit a separate asymptote for mRNA-1273 due to limited data > 6 months for waning in this vaccine. Hybrid waning rates have been shown to be similar to waning rates following two-dose vaccination <sup>1</sup>.**

| Coefficient                                                       | Estimate | SE     | t-value | P-value |
|-------------------------------------------------------------------|----------|--------|---------|---------|
| c <sub>0</sub> (asymptote: time = ∞, BNT162b2/mRNA-1273)          | 3.27     | 0.34   | 9.51    | <0.0001 |
| c <sub>1</sub> (asymptote: time = ∞, infection - c <sub>0</sub> ) | 1.55     | 0.33   | 4.76    | 0.0003  |
| c <sub>2</sub> (slope: BNT162b2/infection)                        | -0.012   | 0.0027 | -4.31   | 0.0006  |
| c <sub>3</sub> (slope: mRNA-1273 - c <sub>2</sub> )               | 0.043    | 0.0019 | 2.30    | 0.0364  |

**Table S3.**

| Vaccine, Endpoint         | VE waned (95% CI)     | VE boosted            | Ratio |
|---------------------------|-----------------------|-----------------------|-------|
| BNT162b2, VE <sub>S</sub> | 46.8% (35.4% - 56.9%) | 85.9% (80.4% - 90.1%) | 1.8   |

|                            |                       |                          |     |
|----------------------------|-----------------------|--------------------------|-----|
| BNT162b2, VE <sub>I</sub>  | 16.3% (10.0% - 24.1%) | 67.6% (56.6% - 77.1%)    | 4.1 |
| mRNA-1273, VE <sub>S</sub> | 54.3% (42.6% - 71.9%) | 84.5% (74.9% - 90.9%)    | 1.6 |
| mRNA-1273, VE <sub>I</sub> | 22.0% (13.7% - 41.7%) | of 64.7% (46.7% - 79.3%) | 2.9 |

**Table S4. Effective reproductive number, fraction vaccinated, fraction infected, and a fraction of the population in four subpopulations in Figure 3 and Figure S2 for each time-location scenario.**

| Scenario  | Month   | R <sub>0</sub> | Frac vacc. | Frac inf. | Frac vacc. and inf. (f <sub>PV</sub> * f <sub>V</sub> ) | Frac. vacc. and not inf. ((1- f <sub>PV</sub> ) * f <sub>V</sub> ) | Frac. not vacc. and inf. (f <sub>PU</sub> * f <sub>U</sub> ) | Frac. fully susc. ((1-f <sub>PU</sub> ) * f <sub>U</sub> ) |
|-----------|---------|----------------|------------|-----------|---------------------------------------------------------|--------------------------------------------------------------------|--------------------------------------------------------------|------------------------------------------------------------|
| US/D      | Sept. 1 | 3.2            | 0.53       | 0.67      | 0.32                                                    | 0.21                                                               | 0.35                                                         | 0.12                                                       |
|           | Oct. 1  | 3.2            | 0.56       | 0.73      | 0.36                                                    | 0.20                                                               | 0.37                                                         | 0.07                                                       |
|           | Nov. 1  | 3.2            | 0.58       | 0.76      | 0.38                                                    | 0.19                                                               | 0.38                                                         | 0.04                                                       |
|           | Dec. 1  | 3.2            | 0.59       | 0.81      | 0.41                                                    | 0.18                                                               | 0.40                                                         | 0.01                                                       |
| CA/D      | Sept. 1 | 3.2            | 0.59       | 0.60      | 0.33                                                    | 0.26                                                               | 0.27                                                         | 0.15                                                       |
|           | Oct. 1  | 3.2            | 0.62       | 0.62      | 0.35                                                    | 0.26                                                               | 0.27                                                         | 0.12                                                       |
|           | Nov. 1  | 3.2            | 0.63       | 0.64      | 0.38                                                    | 0.26                                                               | 0.27                                                         | 0.10                                                       |
|           | Dec. 1  | 3.2            | 0.65       | 0.66      | 0.40                                                    | 0.26                                                               | 0.26                                                         | 0.09                                                       |
| NZ/ND     | Sept. 1 | 7              | 0.24       | 0.002     | 0.00                                                    | 0.24                                                               | 0.001                                                        | 0.76                                                       |
|           | Oct. 1  | 7              | 0.38       | 0.002     | 0.00                                                    | 0.38                                                               | 0.001                                                        | 0.62                                                       |
|           | Nov. 1  | 7              | 0.62       | 0.002     | 0.001                                                   | 0.62                                                               | 0.00                                                         | 0.38                                                       |
|           | Dec. 1  | 7              | 0.71       | 0.003     | 0.002                                                   | 0.71                                                               | 0.001                                                        | 0.29                                                       |
| US/ND     | Sept. 1 | 7              | 0.53       | 0.67      | .32                                                     | 0.21                                                               | 0.35                                                         | 0.12                                                       |
|           | Oct. 1  | 7              | 0.56       | 0.73      | 0.36                                                    | 0.20                                                               | 0.37                                                         | 0.07                                                       |
|           | Nov. 1  | 7              | 0.58       | 0.76      | 0.38                                                    | 0.19                                                               | 0.38                                                         | 0.04                                                       |
|           | Dec. 1  | 7              | 0.59       | 0.81      | 0.41                                                    | 0.18                                                               | 0.40                                                         | 0.01                                                       |
| US/ND-100 | Sept. 1 | 7              | 1.00       | 0.67      | 0.67                                                    | 0.33                                                               | 0                                                            | 0                                                          |

|        |   |      |                    |      |      |   |   |
|--------|---|------|--------------------|------|------|---|---|
| Oct. 1 | 7 | 1.00 | 0.73 <sup>26</sup> | 0.73 | 0.27 | 0 | 0 |
| Nov. 1 | 7 | 1.00 | 0.76               | 0.76 | 0.24 | 0 | 0 |
| Dec. 1 | 7 | 1.00 | 0.81               | 0.81 | 0.19 | 0 | 0 |

**Table S5. Estimated infections and deaths averted (95% CI) given third-dose boosting that takes full effect on September 1, October 1, November 1, or December 1.**

| Month          | Infections averted (95% CI)          | Deaths averted (95% CI)     |
|----------------|--------------------------------------|-----------------------------|
| September 2021 | 37,147,423 (34,530,588 – 38,860,029) | 111,442 (103,592 – 116,580) |
| October 2021   | 24,503,688 (23,045,328 – 25,328,986) | 73,511 (69,136 – 75,987)    |
| November 2021  | 12,124,437 (11,014,685 – 12,788,302) | 36,373 (33,044 – 38,365)    |
| December 2021  | 1,984,987 (1,671,856 – 2,209,045)    | 5,955 (5,016 – 6,627)       |

**Table S6. Delay distributions used for deconvoluting deaths to estimate the timing of infections.**

| Delay                            | Distribution                          |
|----------------------------------|---------------------------------------|
| Infection to shedding            | Gamma (shape = 5.983, scale = 1.455)  |
| Shedding to symptom onset        | Weibull (shape = 0.294, scale = 0.14) |
| Symptom onset to hospitalization | Gamma (shape = 5.078, scale = 0.765)  |
| Hospitalization to death         | Gamma (shape = 2.1, scale = 6.524)    |

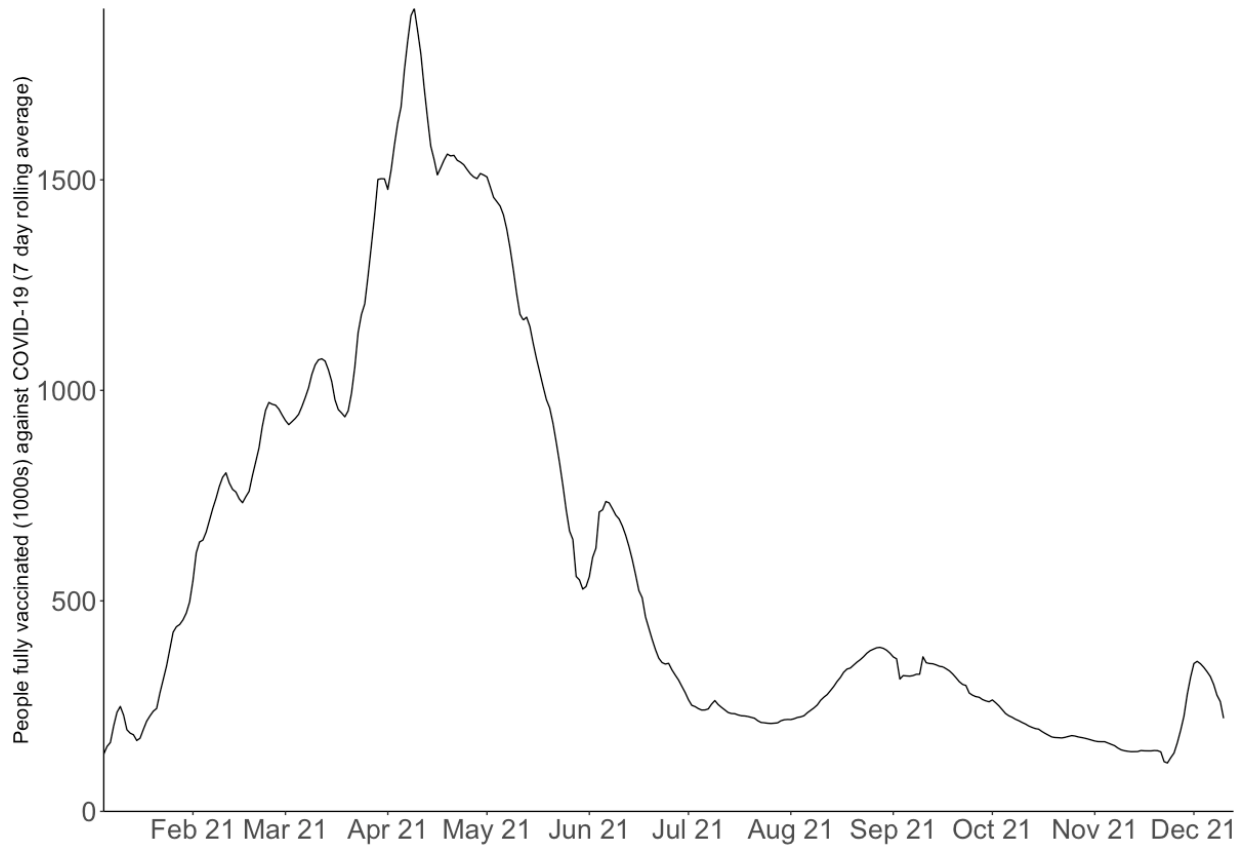

**Figure S1. Number of people fully vaccinated in the USA<sup>2</sup>.**

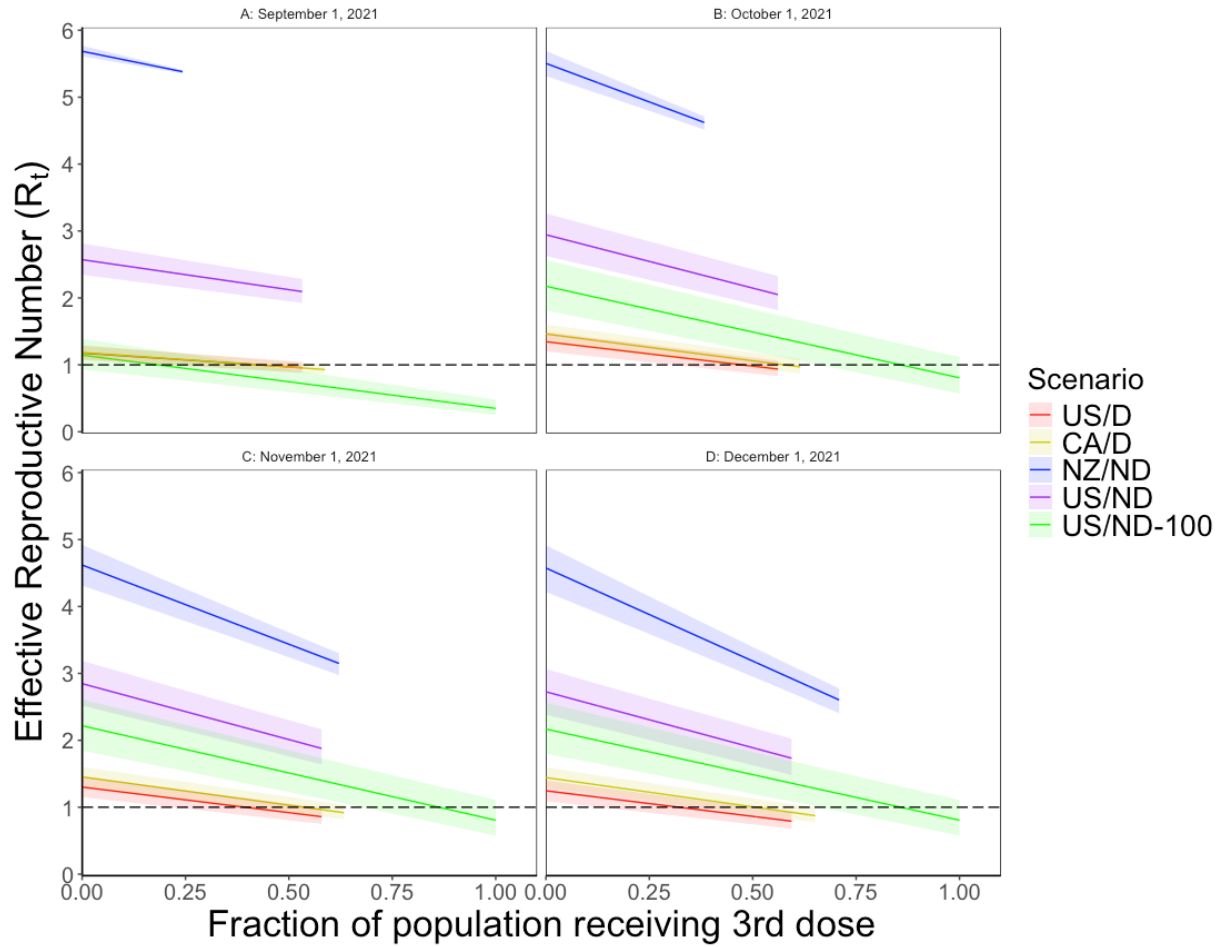

**Figure S2. Lines and 95% CIs show  $R_t$  for five scenarios (see legend) which vary in location (CA – California, NZ – New Zealand, US – United States) with location-specific vaccination and infection as of September 1, October 1, November 1, and December 1, 2021, distancing (D) or no distancing (ND) which determine contact rates and  $R_0$  values. See Table S5 for time-location-specific  $R_0$ , infection rates, and vaccination rates.**

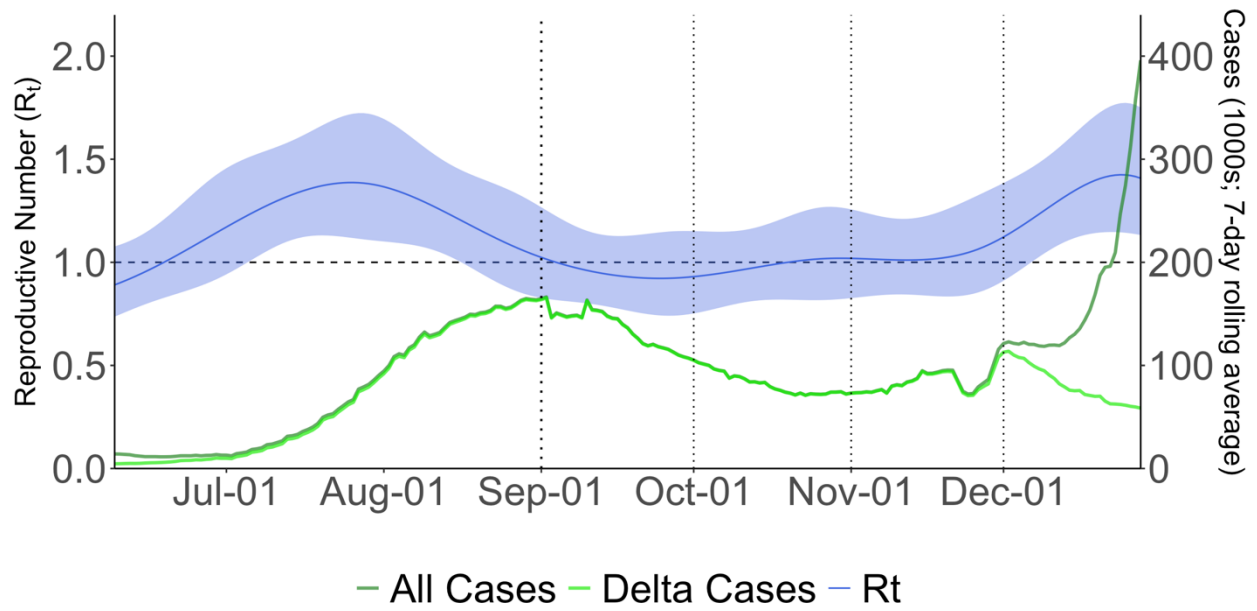

**Figure S3. Reproductive number,  $R_t$  (blue line and ribbon) and daily COVID-19 (all and delta-specific) cases for the USA during the period when the Delta variant was prevalent, July 2021-January 2022. Dotted lines show four separate dates considered for third doses to take full effect.**



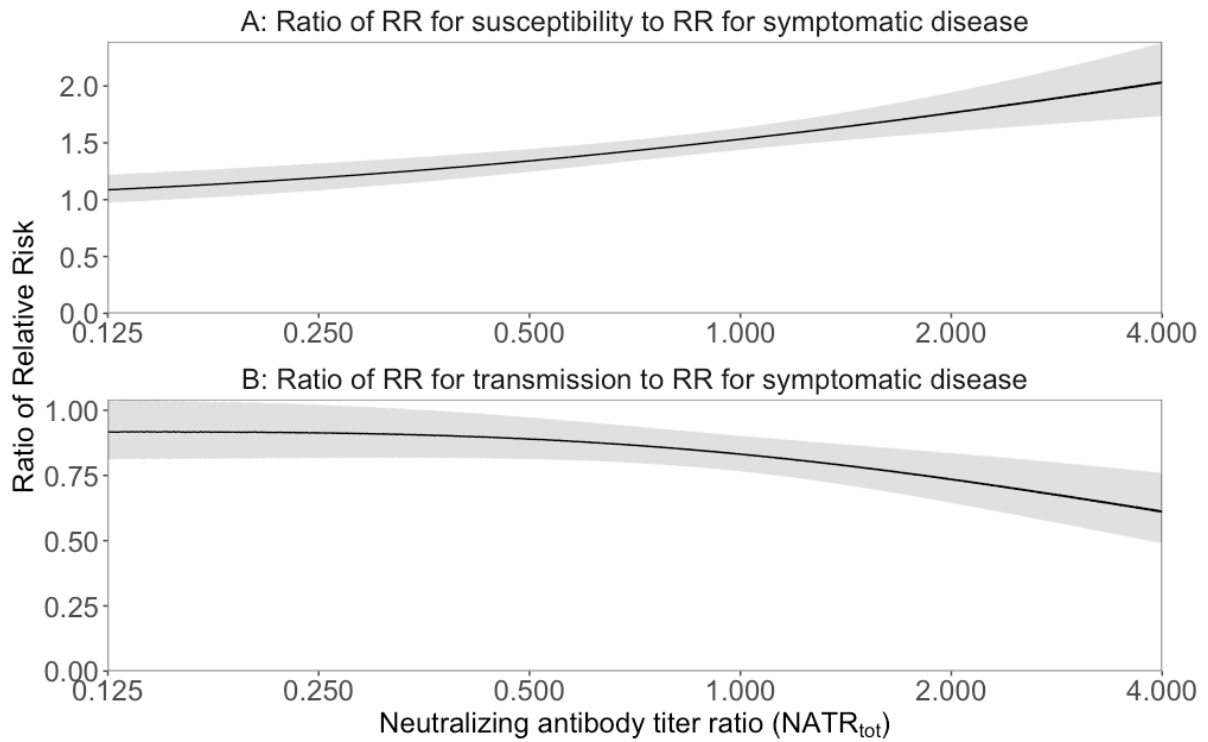

**Figure S4. Lines and 95% CI for the (A) ratio of relative risk ( $1 - VE$ ) for susceptibility from Figure 1A to relative risk for symptomatic disease using estimates from <sup>3</sup> and (B) ratio of relative risk for transmission from Figure 1C to relative risk for symptomatic disease <sup>3</sup> plotted against neutralizing antibody titer ratios (NATR<sub>tot</sub>).**

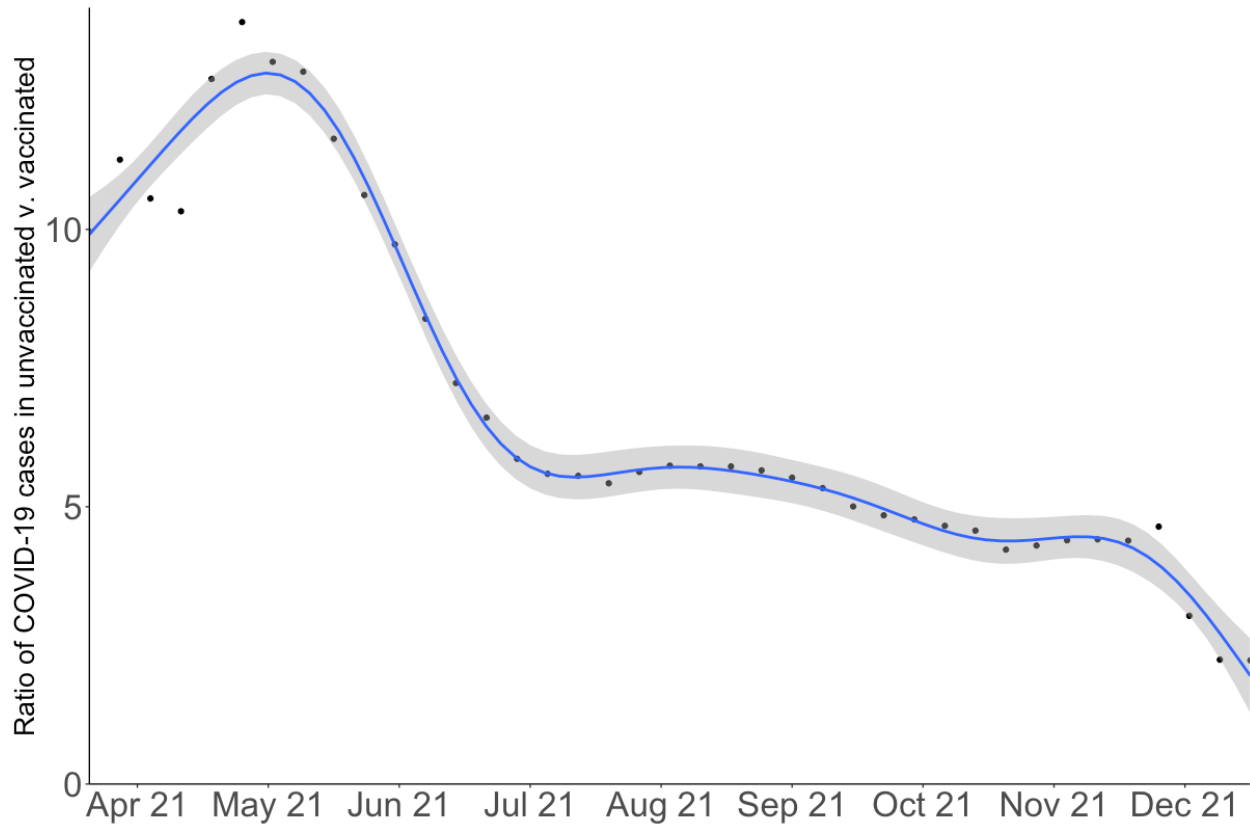

**Figure S5. Ratio of COVID-19 cases in unvaccinated individuals relative to vaccinated individuals in the USA in 2021 based on data from CDC (CDC, 2021d). Points show weekly values, and the line and ribbon shows a generalized additive model fit and 95% CI.**

## References

- 1 Jacobsen H, Sitaras I, Katzmarzyk M, *et al.* Systematic review and meta-analysis of the factors affecting waning of post-vaccination neutralizing antibody responses against SARS-CoV-2. *npj Vaccines* 2023; **8**: 159.
- 2 CDC. COVID-19 Vaccinations in the United States. 2021. [https://covid.cdc.gov/covid-data-tracker/#vaccinations\\_vacc-total-admin-rate-total](https://covid.cdc.gov/covid-data-tracker/#vaccinations_vacc-total-admin-rate-total).
- 3 Gardner BJ, Kilpatrick AM. Predicting Vaccine Effectiveness for Hospitalization and Symptomatic Disease for Novel SARS-CoV-2 Variants Using Neutralizing Antibody Titers. *Viruses* 2024; **16**: 479.
